# Supplementary material
Source: PubMed Central journal article supplement (PMC3190580)
Supplement: NIHMS326609-supplement-suppl_table1.pdf [file NIHMS326609-supplement-suppl_table1.pdf]

Table 3. Data collection and refinement statistics of the H3K4Me<sub>3</sub>-bound PHD finger.

| Data Collection                                        |                                                                                 |                                       |                                     |                                      |
|--------------------------------------------------------|---------------------------------------------------------------------------------|---------------------------------------|-------------------------------------|--------------------------------------|
|                                                        | Native                                                                          | Zn MAD                                |                                     |                                      |
| Space group                                            | P3 <sub>2</sub> 21, a=b=49.18, c=52.65Å, α=β=90°, γ=120°, one molecule per A.U. |                                       |                                     |                                      |
|                                                        |                                                                                 | peak                                  | inflection                          | remote                               |
| Resolution (Å)                                         | 2.0                                                                             | 2.0                                   | 2.0                                 | 2.2                                  |
| Wavelength (Å)                                         | 1.54                                                                            | 1.2791                                | 1.2827                              | 1.2730                               |
| Redundancy <sup>2</sup>                                | 4.4 (4.3)                                                                       | 9.8 (8.1)                             | 8.1 (8.2)                           | 7.8 (7.1)                            |
| Completeness (%)                                       | 97.0 (79.6) <sup>1</sup>                                                        | 99.7 (100.0)                          | 99.8 (100.0)                        | 99.8 (99.7)                          |
| Rmerge <sup>3</sup>                                    | 0.039 (0.094)                                                                   | 0.080 (0.180)                         | 0.097 (0.358)                       | 0.111 (0.376)                        |
| I/σ(I)                                                 | 51.1 (18.5)                                                                     | 50.4 (22.5)                           | 45.1 (11.8)                         | 43.0 (14.4)                          |
| Refinement Statistics ( F >0)                          |                                                                                 |                                       |                                     |                                      |
| Resolution (Å)                                         | 30-2.0                                                                          |                                       |                                     |                                      |
| R <sub>working</sub> (number of reflections)           | 0.223                                                                           |                                       |                                     |                                      |
| R <sub>free</sub> <sup>4</sup> (number of reflections) | 0.231                                                                           |                                       |                                     |                                      |
| Number of protein atoms                                | 491                                                                             |                                       |                                     |                                      |
| Number of non-protein atoms                            | 32 water molecules and 2 zinc ions                                              |                                       |                                     |                                      |
| R.m.s.d. from ideal bond length (Å)                    | 0.006                                                                           |                                       |                                     |                                      |
| R.m.s.d. from ideal bond angle (o)                     | 1.080                                                                           |                                       |                                     |                                      |
| Ramachandran statistics                                | Most favored<br>39 residues                                                     | Additoinally<br>allowed<br>7 residues | Generously<br>allowed<br>1 residues | Disallowed <sup>5</sup><br>1 residue |

<sup>1</sup> The completeness of the 2.0-1.9Å resolution shell falls to 38% so we decided to use the 2Å data set for further refinement.

<sup>2</sup> Numbers in parenthesis represent values for the highest resolution bin.

<sup>3</sup>  $R_{\text{merge}} = \sum |I_{\text{obs}} - I_{\text{avg}}| / \sum I_{\text{avg}}$ .

<sup>4</sup> R<sub>free</sub> was calculated with 10% of reflections.

<sup>5</sup> Residue Glu237 is clearly in a conformation which Phi/Psi values fall into the disallowed region of the Ramachandran plot.
